# Supplementary material
Source: PubMed Central journal article supplement (PMC4772439)
Supplement: supp_kwv455_kwv455supp.pdf [file supp_kwv455_kwv455supp.pdf]

## Web Material

### Table of Contents

#### Web Tables 1–3

1. Eligible sampling ICD discharge codes
2. Comorbidities related ICD codes
3. Prevalence and PPVs of sampling codes and comorbidities

#### Web Appendix

1. Derivation of models
2. Variance estimation

#### Web Tables 4–11

4. Model selection for 428 primary group
5. Model selection for 428 nonprimary group
6. Model selection for 428 absent group
7. Comparison of sampling codes – ARIC vs. NIS
8. Comparison of characteristics – ARIC vs. NIS
9. Multivariate model to predict ADHF for 428 primary group
10. Multivariate model to predict ADHF for 428 nonprimary group
11. Multivariate model to predict ADHF for 428 absent group

#### Web Figure 1

1. AUCs for models

#### Web Tables 12–14

12. Frequency of hospitalizations by 428 group over study years
13. Annual percentage change in hospitalizations, estimated ADHF and their rates
14. Frequency of estimated ADHF hospitalization by 428 group, and total over study years

#### Web Figures 2–3

2. Predicted vs. observed probability of ADHF by decile of risk score
3. Temporal trends in hospitalization frequency and rates by age categories

## WEB TABLES

| <b>Web Table 1.</b> Description of eligible ICD codes used to sample potential Heart Failure hospitalizations in the ARIC HF surveillance |                                                                                                  |
|-------------------------------------------------------------------------------------------------------------------------------------------|--------------------------------------------------------------------------------------------------|
| <b>ICD Code</b>                                                                                                                           | <b>Disease Classification</b>                                                                    |
| 398.91                                                                                                                                    | Rheumatic heart disease                                                                          |
| 402.01                                                                                                                                    | Hypertensive heart disease-malignant with CHF                                                    |
| 402.11                                                                                                                                    | Hypertensive heart disease-benign with CHF                                                       |
| 402.91                                                                                                                                    | Unspecified hypertensive heart disease with CHF                                                  |
| 404.01                                                                                                                                    | Hypertensive heart disease and renal failure-malignant with CHF                                  |
| 404.03                                                                                                                                    | Hypertensive heart disease and renal failure-malignant with congestive heart and renal failure   |
| 404.11                                                                                                                                    | Hypertensive heart disease and renal failure-benign with CHF                                     |
| 404.13                                                                                                                                    | Hypertensive heart disease and renal failure-benign with congestive heart and renal failure      |
| 404.91                                                                                                                                    | Hypertensive heart disease and renal failure-unspecified with CHF                                |
| 404.93                                                                                                                                    | Hypertensive heart disease and renal failure-unspecified with congestive heart and renal failure |
| 415                                                                                                                                       | Acute cor pulmonale                                                                              |
| 416.9                                                                                                                                     | Chronic pulmonary heart disease, unspecified                                                     |
| 425.4                                                                                                                                     | Other primary cardiomyopathies                                                                   |
| 428.x                                                                                                                                     | CHF                                                                                              |
| 518.4                                                                                                                                     | Acute edema of lung, unspecified abnormalities                                                   |
| 786.0x                                                                                                                                    | Dyspnea and respiratory                                                                          |
| CHF, congestive heart failure; ICD-9-CM, <i>International Classification of Diseases, Ninth Revision, Clinical Modification</i> .         |                                                                                                  |
| The same codes were used in both the Atherosclerosis Risk in Community Study surveillance and the National Inpatient Sample.              |                                                                                                  |

**Web Table 2.** Description of ICD codes used to define comorbidities in both ARIC heart failure surveillance and the National Inpatient Sample database

|                                                 |                                                                                                                                                                                                                             |
|-------------------------------------------------|-----------------------------------------------------------------------------------------------------------------------------------------------------------------------------------------------------------------------------|
| Heart valve disorder                            | 424.0, 424.1, 424.2, 424.3, 424.90, 424.91, 424.99, 785.2, 785.3, V42.2 V43.3                                                                                                                                               |
| Atrial fibrillation/atrial flutter              | 427.31, 427.32                                                                                                                                                                                                              |
| Cardiac dysrhythmias (not AF or atrial flutter) | 427.0, 427.1, 427.2, 427.9, 427.60, 427.41, 427.42, 427.5, 427.61, 427.69, 427.81, 427.89, 427.9, 785.0, 785.1                                                                                                              |
| Conduction disorder                             | 426.0, 426.10, 426.11, 426.12, 426.13, 426.2, 426.3, 426.4, 426.50, 426.51, 426.52, 426.53, 426.54, 426.6, 426.7, 426.81, 426.82, 426.89, 426.9, V45.0, V45.00 V45.01, V45.02, V45.09, V53.3, V53.31, V53.32, V53.39 410.xx |
| Acute myocardial infarction                     | 411.0, 411.1, 411.8, 411.81, 411.89, 412 413.0, 413.1, 413.9, 414.0, 414.00, 414.01, 414.06, 414.2, 414.3, 414.4, 414.8, 414.9, V458.1, V458.2                                                                              |
| Coronary atherosclerosis or other heart disease | 411.0, 411.1, 411.8, 411.81, 411.89, 412 413.0, 413.1, 413.9, 414.0, 414.00, 414.01, 414.06, 414.2, 414.3, 414.4, 414.8, 414.9, V458.1, V458.2                                                                              |
| Chronic kidney disease                          | 585.0, 585.1, 585.2, 585.3, 585.4, 585.5, 585.6, 585.9, 792.5, V42.0, V45.1, V45.11, V45.12, V56.0, V56.1, V56.2, V56.31, V56.32, V56.8                                                                                     |
| Acute kidney injury                             | 584.5, 584.6, 584.7, 584.8, 584.9, 586                                                                                                                                                                                      |
| COPD exacerbation                               | 491.21, 491.22, 494.1                                                                                                                                                                                                       |
| Pneumonia                                       | 480.x, 481.x, 482.x, 483.x, 484.x, 485.x, 486.x                                                                                                                                                                             |
| Other fluid and electrolyte disorders           | 276.0, 276.2, 276.3, 276.4, 276.6, 276.69, 276.9, 995.1                                                                                                                                                                     |
| Anemia                                          | 285.21, 285.29, 285.9                                                                                                                                                                                                       |
| Hypertension                                    | 401.x                                                                                                                                                                                                                       |

AF, atrial fibrillation; COPD, chronic obstructive pulmonary disease; ICD-9-CM, *International Classification of Diseases, Ninth Revision, Clinical Modification*.

The same codes were used in both the Atherosclerosis Risk in Community Study surveillance and the National Inpatient Sample. The codes are similar to those suggested by National Inpatient Sample clinical classification software.

**Web Table 3.** Prevalence and corresponding positive predictive value (ADHF) for study characteristics by 428 groups in the ARIC ADHF surveillance

|                                                                                                                                                                                               | 428 Primary<br>(n = 2083) |     | 428 Nonprimary<br>(n = 6936) |     | 428 Absent<br>(n = 3431) |     |
|-----------------------------------------------------------------------------------------------------------------------------------------------------------------------------------------------|---------------------------|-----|------------------------------|-----|--------------------------|-----|
|                                                                                                                                                                                               | %                         | PPV | %                            | PPV | %                        | PPV |
| <b>Eligible codes</b>                                                                                                                                                                         |                           |     |                              |     |                          |     |
| 428 in primary position                                                                                                                                                                       | 100                       | 90  |                              |     | 0                        |     |
| 428 in second position                                                                                                                                                                        | 0                         |     | 28                           | 38  | 0                        |     |
| 428 in position 3–26                                                                                                                                                                          | 0                         |     | 72                           | 30  | 0                        |     |
| 428 absent                                                                                                                                                                                    | 0                         |     | 0                            |     | 100                      | 16  |
| Rheumatic HF                                                                                                                                                                                  | 0                         |     | 0                            | 80  | 6                        | 68  |
| Hypertensive HF                                                                                                                                                                               | 1                         | 95  | 4                            | 55  | 0                        | 56  |
| Renal HF                                                                                                                                                                                      | 1                         | 89  | 4                            | 59  | 1                        | 58  |
| Pulmonary HF                                                                                                                                                                                  | 1                         | 100 | 1                            | 52  | 5                        | 20  |
| Cardiomyopathy                                                                                                                                                                                | 17                        | 92  | 11                           | 44  | 42                       | 12  |
| Pulmonary edema                                                                                                                                                                               | 0                         | 100 | 0                            | 76  | 4                        | 61  |
| Respiratory distress                                                                                                                                                                          | 3                         | 93  | 3                            | 48  | 41                       | 8   |
| <b>Comorbid conditions</b>                                                                                                                                                                    |                           |     |                              |     |                          |     |
| Atrial fibrillation                                                                                                                                                                           | 37                        | 93  | 35                           | 38  | 26                       | 21  |
| Cardiac dysrhythmia                                                                                                                                                                           | 16                        | 92  | 16                           | 40  | 18                       | 16  |
| Conduction disorder                                                                                                                                                                           | 11                        | 91  | 10                           | 44  | 9                        | 18  |
| Myocardial infarction                                                                                                                                                                         | 4                         | 97  | 8                            | 61  | 4                        | 37  |
| COPD                                                                                                                                                                                          | 9                         | 86  | 12                           | 44  | 8                        | 14  |
| <b>Other characteristics</b>                                                                                                                                                                  |                           |     |                              |     |                          |     |
| Race                                                                                                                                                                                          | 0                         |     | 0                            |     | 0                        |     |
| Caucasian                                                                                                                                                                                     | 57                        | 90  | 60                           | 32  | 64                       | 14  |
| NonCaucasian                                                                                                                                                                                  | 43                        |     | 38                           |     | 32                       |     |
| Sex                                                                                                                                                                                           | 0                         |     | 0                            |     | 0                        |     |
| Female                                                                                                                                                                                        | 49                        | 89  | 52                           | 31  | 46                       | 17  |
| Male                                                                                                                                                                                          | 51                        | 91  | 47                           | 34  | 51                       | 16  |
| Teaching hospital status                                                                                                                                                                      | 0                         |     | 0                            |     | 0                        |     |
| Teaching                                                                                                                                                                                      | 33                        | 92  | 38                           | 32  | 30                       | 19  |
| Nonteaching                                                                                                                                                                                   | 66                        | 89  | 61                           | 31  | 68                       | 15  |
| Age group, years                                                                                                                                                                              | 0                         |     | 0                            |     | 0                        |     |
| 55-64                                                                                                                                                                                         | 22                        | 90  | 22                           | 32  | 29                       | 16  |
| 65-74                                                                                                                                                                                         | 25                        | 89  | 26                           | 31  | 28                       | 14  |
| ≥75                                                                                                                                                                                           | 51                        | 90  | 53                           | 32  | 43                       | 18  |
| ARIC HF surveillance of potential HF hospitalizations in four US communities (age ≥55 years at discharge). % is column percent. HF, heart failure; PPV, positive predictive value [for ADHF]. |                           |     |                              |     |                          |     |

## WEB APPENDIX

### *1. Derivation of model to predict ADHF probability from the ARIC HF surveillance*

Additional details regarding derivation of the validation models as well as additional results from model-building are provided here.

Models were developed separately for the three ICD code 428 code groups: 428 primary, nonprimary, and absent (non428 eligible ICD codes). We used a structured approach to build multivariate logistic regression models to predict the probability of ADHF. All models included age, race, sex, and teaching hospital status. We collapsed certain groups of HF codes defining conceptually similar and low prevalent conditions such as hypertensive heart failure, hypertensive-renal heart failure, rheumatic heart failure, pulmonary heart failure etc. into an ‘other heart failure group’. We then identified comorbidities that are common in patients with heart failure (coronary atherosclerosis, chronic kidney disease, electrolyte imbalance-hyponatremia), those that may precipitate ADHF (atrial fibrillation, acute myocardial infarction), or may represent a treatment complication (acute kidney injury) and considered those with > 5% prevalence in at least one of the three ICD code 428 groups.

Model selection was conducted to achieve adequate model fit, discrimination and calibration while minimizing model complexity to avoid over-fitting. Variables defining presence of HF codes, position of the 428 code (second position vs. 3-26 included in the ICD code 428 nonprimary group only) and comorbidity codes were selected using a forward stepwise procedure (Wald test  $P$  value < 0.20) and then eliminated in a stepwise fashion until measures of model fit, discrimination and calibration (Hosmer-Lemeshow, AUC and Integrated discrimination improvement [IDI], respectively) were impacted. See Supplementary Tables 5a-c for a summary of the results. In these reduced models, we replaced comorbidity in any position variables with two code position variables (primary vs. nonprimary) to test the significance of code position. Position variables were kept only if both were significant (Wald  $P$  value < 0.20); otherwise the presence variable was maintained in the model. We also examined Arjas plots to assess final model fit (Supplementary Figure 2).

To assess internal validity of the final models, we examined AUC and calibration slope corrected for optimism (1000 bootstrap samples).<sup>12,13</sup> We fitted models with interaction terms and examined Arjas plots in subgroups to assess consistency of model fit across ARIC community and study year.

Final models with optimism-corrected statistics are presented in Supplementary Tables 6a-c, ROC curves are presented in Supplementary Figure 1 and Arjas plots are presented in Supplementary Figures 2-4.

## 2. Variance of the Estimator of ADHF Hospitalizations Count and Rate

We applied the ADHF validation models derived in ARIC to NIS data to estimate the total number of ADHF hospitalizations. Population estimates were then used to calculate rates. The count estimator and derivation of the variance of the count estimator are presented here as well as the variance of the rate estimator.

The count estimator is composed of the sum of validation model-based predicted probabilities restricted to the domain defined by inclusion criteria described in Figure 1, summed over NIS strata, sampled hospitals within strata and hospitalizations within sampled hospitals. The validation model applied differs by ICD code 428 code group (primary, nonprimary, absent).

The set of NIS strata is  $A = \{1, \dots, a, \dots, N_A\}$ , the set of hospitals in stratum  $a$  is  $U_{ai} = \{1, \dots, i, \dots, N_{ai}\}$  and the set of hospitalizations in stratum  $a$ , hospital  $i$  is  $H_{ai} = \{1, \dots, k, \dots, N_{aiH}\}$ . The inclusion probability for hospital  $i$  from stratum  $a$  is  $\pi_{ai}$  and the set of sampled hospitals is  $S_a$ .

The estimator of the number of ADHF hospitalizations for domain  $D$  is therefore given in Equation (1).

$$\hat{T}_D = \sum_{a=1}^{N_A} \sum_{i=1}^{N_{ai}} \sum_{k=1}^{N_{aiH}} \pi_{ai}^{-1} I(i \in S_a) I(k \in D) \text{logit}^{-1}(x_{aik} \hat{\beta}_c | c, x_{aik}) \quad (1)$$

where  $D$  is the domain satisfying inclusion criteria described in Figure 1. NIS data and logistic regression coefficient estimates from the ARIC validation model used to calculate predicted probabilities are represented by the vectors  $x_{aik}$  and  $\hat{\beta}_c$ , respectively. ICD code 428 code group is represented by  $c$ .  $I(z)$  is an indicator variable taking on the value 1 when  $z$  is true, 0 otherwise.

The variance of the estimate in (1) is therefore given by (2):

$$\text{Var}(\hat{T}_D) = E\{\text{Var}(\hat{T}_D | \hat{\beta}) + \text{Var}\{E(\hat{T}_D | \hat{\beta})\} \quad (2)$$

Since  $\hat{\beta}$  is an unbiased estimate,  $E\{\text{Var}(\hat{T}_D | \hat{\beta})\} = \text{Var}(\hat{T}_D | \beta)$ .

To calculate  $\text{Var}(\hat{T}_D | \beta)$ , let the number of estimated ADHF hospitalizations for domain  $D$  in hospital  $I$  and stratum  $a$ , be represented by  $t_{aiD}$  defined in (3).

$$t_{aiD} = \sum_{k=1}^{N_{aiH}} I(k \in D) \text{logit}^{-1}(x_{aik} \beta_c | c, x_{aik}) \quad (3)$$

Then the variance of  $\hat{T}_D$  given  $\beta$  is defined in (4).

$$\text{Var}(\hat{T}_D | \beta) = \sum_{a=1}^A \sum_{i=1}^{N_{ai}} \sum_{j=1}^{N_{aj}} \frac{\pi_{aij} - \pi_{ai}\pi_{aj}}{\pi_{aij}} \frac{t_{aiD}}{\pi_{ai}} \frac{t_{ajD}}{\pi_{aj}} \quad (4)$$

where  $\pi_{aij} = \text{Pr}(\text{hospital } i \text{ and hospital } j \text{ in stratum } a \text{ are both selected})$ .

Denote  $\tilde{t}_{aiD}$  as  $\sum_{k=1}^{N_{aiH}} I(k \in D) \text{logit}^{-1}(x_{aik}\hat{\beta}_{y_k} | y_k, x_{aik})$ , and

$$\widehat{\text{Var}}(\hat{T}_D | \beta) = \sum_{a=1}^A \sum_{i=1}^{N_{ai}} \sum_{j=1}^{N_{aj}} \frac{\pi_{aij} - \pi_{ai}\pi_{aj}}{\pi_{aij}} \frac{\tilde{t}_{aiD}}{\pi_{ai}} \frac{\tilde{t}_{ajD}}{\pi_{aj}}. \quad (5)$$

Note: in the case of simple random cluster sampling (as in NIS),

$$\pi_{ai} = \frac{n_{as}}{N_{ai}}$$

$$\pi_{aij} = \pi_{ai}, \text{ if } i = j$$

$$\pi_{aij} = \frac{n_{as}(n_{as} - 1)}{N_{ai}(N_{ai} - 1)}, \text{ if } i \neq j$$

Where  $n_{as}$  is the number of selected hospitals in stratum  $a$  and  $N_{ai}$  is the number of all hospitals in stratum  $a$ .

For the second term in (2),

$$\text{E}(\hat{T}_D | \hat{\beta}) = \sum_{a=1}^{N_A} \sum_{i=1}^{N_{ai}} \sum_{k=1}^{N_{aiH}} I(k \in D) \text{logit}^{-1}(x_{aik}\hat{\beta}_c | c, x_{aik}). \quad (6)$$

To estimate the variance of (6) we apply the delta method to the asymptotic distribution of  $\hat{\beta}$ :

$$\widehat{\text{Var}}\{\text{E}(\hat{T}_D | \hat{\beta})\} = \sum_{c=1}^3 f(\hat{\beta}_c) \text{AV}(\hat{\beta}_c) f(\hat{\beta}_c)^T \quad (7)$$

Where the vector function of  $\hat{\beta}_c$ ,

$$f(\hat{\beta}) = \sum_{a=1}^{N_A} \sum_{i=1}^{N_{ai}} \sum_{k=1}^{N_{aik}} I(k \in D \text{ and } k \in c) x_k \frac{\exp(x_{aik} \hat{\beta}_c)}{\{1 + \exp(x_{aik} \hat{\beta}_c)\}^2},$$

and  $AV(\hat{\beta}_c)$  is the asymptotic covariance matrix of  $\hat{\beta}_c$ .

Thus, by combining the variance estimates in (5) and (7), we obtain the variance estimate of  $\hat{T}_D$ :

$$\widehat{Var}(\hat{T}_D) = \sum_{a=1}^A \sum_{i=1}^{N_{ai}} \sum_{j=1}^{N_{ai}} \frac{\pi_{aij} - \pi_{ai}\pi_{aj}}{\pi_{aij}} \frac{\tilde{t}_{aiD}}{\pi_{ai}} \frac{\tilde{t}_{ajD}}{\pi_{aj}} + \sum_{c=1}^3 f(\hat{\beta}_c) AV(\hat{\beta}_c) f(\hat{\beta}_c)^T$$

The rate estimator is simply the count estimator divided by the corresponding inter-censal population estimate. For the variance calculation, the population estimate is treated as fixed.



**Web Table 4.** Results of model selection to predict ADHF among those hospitalizations with ICD code 428 in primary position

| Variable                                                                                                                                                                                                                                                                                                                                                                                                                                                                                                                                                                                                                           | Basic Model | Optimal Model             | Extended Model           |
|------------------------------------------------------------------------------------------------------------------------------------------------------------------------------------------------------------------------------------------------------------------------------------------------------------------------------------------------------------------------------------------------------------------------------------------------------------------------------------------------------------------------------------------------------------------------------------------------------------------------------------|-------------|---------------------------|--------------------------|
| Wald test <i>P</i> values                                                                                                                                                                                                                                                                                                                                                                                                                                                                                                                                                                                                          |             |                           |                          |
| Age group                                                                                                                                                                                                                                                                                                                                                                                                                                                                                                                                                                                                                          | 0.803       | 0.609                     | 0.549                    |
| Male                                                                                                                                                                                                                                                                                                                                                                                                                                                                                                                                                                                                                               | 0.318       | 0.410                     | 0.314                    |
| Caucasian                                                                                                                                                                                                                                                                                                                                                                                                                                                                                                                                                                                                                          | 0.540       | 0.961                     | 0.908                    |
| Teaching hospital                                                                                                                                                                                                                                                                                                                                                                                                                                                                                                                                                                                                                  | 0.110       | 0.091                     | 0.115                    |
| Heart valve disorder                                                                                                                                                                                                                                                                                                                                                                                                                                                                                                                                                                                                               |             | <0.001                    | <0.001                   |
| Acute myocardial infarction                                                                                                                                                                                                                                                                                                                                                                                                                                                                                                                                                                                                        |             | 0.002                     | 0.002                    |
| Atrial fibrillation                                                                                                                                                                                                                                                                                                                                                                                                                                                                                                                                                                                                                |             | 0.004                     | 0.005                    |
| Chronic kidney disease                                                                                                                                                                                                                                                                                                                                                                                                                                                                                                                                                                                                             |             | 0.003                     | 0.016                    |
| COPD exacerbation                                                                                                                                                                                                                                                                                                                                                                                                                                                                                                                                                                                                                  |             |                           | 0.110                    |
| Anemia                                                                                                                                                                                                                                                                                                                                                                                                                                                                                                                                                                                                                             |             |                           | 0.143                    |
| Measures of model fit, discrimination and calibration                                                                                                                                                                                                                                                                                                                                                                                                                                                                                                                                                                              |             |                           |                          |
| Hosmer-Lemeshow <i>P</i> value                                                                                                                                                                                                                                                                                                                                                                                                                                                                                                                                                                                                     | 0.906       | 0.371                     | 0.711                    |
| AUC                                                                                                                                                                                                                                                                                                                                                                                                                                                                                                                                                                                                                                | 0.557       | 0.652                     | 0.655                    |
| IDI                                                                                                                                                                                                                                                                                                                                                                                                                                                                                                                                                                                                                                |             | 0.042 (0.01) <sup>*</sup> | 0.00 (0.01) <sup>†</sup> |
| <p>The basic model includes variables forced into all models.</p> <p>The reduced model includes variables selected through forward stepwise procedure (Wald <i>P</i> value &lt; 0.20) and excludes those eliminated through consideration of model fit, discrimination and calibration. The reduced model forms the basis for final validation models (after consideration of position of HF codes).</p> <p>The extended model includes all variables selected through forward stepwise procedure (Wald <i>P</i> value &lt; 0.20).</p> <p><sup>*</sup> Compared to basic model.</p> <p><sup>†</sup> Compared to optimal model.</p> |             |                           |                          |

**Web Table 5.** Results of model selection to predict ADHF among those hospitalizations with ICD code 428 in nonprimary position

| Variable                                                                                                                                                                                                                                                                                                                                                                                                                                                                                                                                                                                                     | Basic Model | Optimal Model              | Extended Model             |
|--------------------------------------------------------------------------------------------------------------------------------------------------------------------------------------------------------------------------------------------------------------------------------------------------------------------------------------------------------------------------------------------------------------------------------------------------------------------------------------------------------------------------------------------------------------------------------------------------------------|-------------|----------------------------|----------------------------|
| Wald test <i>P</i> values                                                                                                                                                                                                                                                                                                                                                                                                                                                                                                                                                                                    |             |                            |                            |
| Age group                                                                                                                                                                                                                                                                                                                                                                                                                                                                                                                                                                                                    | 0.682       | 0.327                      | 0.303                      |
| Male                                                                                                                                                                                                                                                                                                                                                                                                                                                                                                                                                                                                         | 0.019       | 0.229                      | 0.239                      |
| Caucasian                                                                                                                                                                                                                                                                                                                                                                                                                                                                                                                                                                                                    | 0.391       | 0.715                      | 0.783                      |
| Teaching hospital                                                                                                                                                                                                                                                                                                                                                                                                                                                                                                                                                                                            | 0.300       | 0.002                      | 0.002                      |
| Acute myocardial infarction                                                                                                                                                                                                                                                                                                                                                                                                                                                                                                                                                                                  |             | <0.001                     | <0.001                     |
| Other heart failure                                                                                                                                                                                                                                                                                                                                                                                                                                                                                                                                                                                          |             | <0.001                     | <0.001                     |
| Pneumonia                                                                                                                                                                                                                                                                                                                                                                                                                                                                                                                                                                                                    |             | <0.001                     | <0.001                     |
| Heart failure code in 2nd position                                                                                                                                                                                                                                                                                                                                                                                                                                                                                                                                                                           |             | <0.001                     | <0.001                     |
| Acute kidney injury                                                                                                                                                                                                                                                                                                                                                                                                                                                                                                                                                                                          |             | <0.001                     | <0.001                     |
| Atrial fibrillation                                                                                                                                                                                                                                                                                                                                                                                                                                                                                                                                                                                          |             | <0.001                     | <0.001                     |
| Chronic obstructive pulmonary disease                                                                                                                                                                                                                                                                                                                                                                                                                                                                                                                                                                        |             | <0.001                     | <0.001                     |
| Heart valve disorder                                                                                                                                                                                                                                                                                                                                                                                                                                                                                                                                                                                         |             | <0.001                     | <0.001                     |
| Cardiomyopathy                                                                                                                                                                                                                                                                                                                                                                                                                                                                                                                                                                                               |             | <0.001                     | <0.001                     |
| Other fluid and electrolyte disorders                                                                                                                                                                                                                                                                                                                                                                                                                                                                                                                                                                        |             | <0.001                     | <0.001                     |
| Dyspnea and respiratory abnormalities                                                                                                                                                                                                                                                                                                                                                                                                                                                                                                                                                                        |             | <0.001                     | <0.001                     |
| Uncomplicated hypertension                                                                                                                                                                                                                                                                                                                                                                                                                                                                                                                                                                                   |             | <0.001                     | 0.006                      |
| Conduction disorder                                                                                                                                                                                                                                                                                                                                                                                                                                                                                                                                                                                          |             | 0.002                      | 0.002                      |
| Cardiac dysrhythmias (not AF or atrial flutter)                                                                                                                                                                                                                                                                                                                                                                                                                                                                                                                                                              |             | 0.005                      | 0.005                      |
| Chronic kidney disease                                                                                                                                                                                                                                                                                                                                                                                                                                                                                                                                                                                       |             |                            | 0.182                      |
| Measures of model fit, discrimination and calibration                                                                                                                                                                                                                                                                                                                                                                                                                                                                                                                                                        |             |                            |                            |
| Hosmer-Lemeshow <i>P</i> value                                                                                                                                                                                                                                                                                                                                                                                                                                                                                                                                                                               | 0.636       | 0.109                      | 0.246                      |
| AUC                                                                                                                                                                                                                                                                                                                                                                                                                                                                                                                                                                                                          | 0.513       | 0.727                      | 0.726                      |
| IDI                                                                                                                                                                                                                                                                                                                                                                                                                                                                                                                                                                                                          |             | 0.063 (0.002) <sup>a</sup> | 0.001 (0.002) <sup>b</sup> |
| <p>The basic model includes variables forced into all models.</p> <p>The reduced model includes variables selected through forward stepwise procedure (Wald <i>P</i> value &lt; 0.20) and excludes those eliminated through consideration of model fit, discrimination and calibration. The reduced model forms the basis for final validation models (after consideration of position of HF codes).</p> <p>The extended model Includes all variables selected through forward stepwise procedure (Wald <i>P</i> value &lt; 0.20).</p> <p>* Compared to basic model.</p> <p>† Compared to optimal model.</p> |             |                            |                            |

**Web Table 6.** Results of model selection to predict ADHF among those hospitalizations with ICD code 428 absent with other eligible codes

| Variable                                                                                                                                                                                                                                                                                                                                                                                                                                                                                                                                                                                                                           | Basic Model | Reduced Model              | Extended Model             |
|------------------------------------------------------------------------------------------------------------------------------------------------------------------------------------------------------------------------------------------------------------------------------------------------------------------------------------------------------------------------------------------------------------------------------------------------------------------------------------------------------------------------------------------------------------------------------------------------------------------------------------|-------------|----------------------------|----------------------------|
| Wald test <i>P</i> values                                                                                                                                                                                                                                                                                                                                                                                                                                                                                                                                                                                                          |             |                            |                            |
| Age group                                                                                                                                                                                                                                                                                                                                                                                                                                                                                                                                                                                                                          | 0.066       | 0.099                      | 0.075                      |
| Male                                                                                                                                                                                                                                                                                                                                                                                                                                                                                                                                                                                                                               | 0.617       | 0.419                      | 0.309                      |
| Caucasian                                                                                                                                                                                                                                                                                                                                                                                                                                                                                                                                                                                                                          | 0.490       | 0.707                      | 0.605                      |
| Teaching hospital                                                                                                                                                                                                                                                                                                                                                                                                                                                                                                                                                                                                                  | 0.005       | 0.020                      | 0.021                      |
| Other heart failure                                                                                                                                                                                                                                                                                                                                                                                                                                                                                                                                                                                                                |             | <0.001                     | <0.001                     |
| Acute myocardial infarction                                                                                                                                                                                                                                                                                                                                                                                                                                                                                                                                                                                                        |             | <0.001                     | <0.001                     |
| Chronic kidney disease                                                                                                                                                                                                                                                                                                                                                                                                                                                                                                                                                                                                             |             | <0.001                     | <0.001                     |
| Other fluid and electrolyte disorders                                                                                                                                                                                                                                                                                                                                                                                                                                                                                                                                                                                              |             | <0.001                     | <0.001                     |
| Atrial fibrillation                                                                                                                                                                                                                                                                                                                                                                                                                                                                                                                                                                                                                |             | 0.002                      | 0.002                      |
| Cardiomyopathy in primary position                                                                                                                                                                                                                                                                                                                                                                                                                                                                                                                                                                                                 |             | 0.002                      | 0.003                      |
| Coronary atherosclerosis or other heart disease                                                                                                                                                                                                                                                                                                                                                                                                                                                                                                                                                                                    |             |                            | 0.049                      |
| Measures of model fit, discrimination and calibration                                                                                                                                                                                                                                                                                                                                                                                                                                                                                                                                                                              |             |                            |                            |
| Hosmer-Lemeshow <i>P</i> value                                                                                                                                                                                                                                                                                                                                                                                                                                                                                                                                                                                                     | 0.362       | 0.018                      | 0.159                      |
| AUC                                                                                                                                                                                                                                                                                                                                                                                                                                                                                                                                                                                                                                | 0.548       | 0.799                      | 0.800                      |
| IDI                                                                                                                                                                                                                                                                                                                                                                                                                                                                                                                                                                                                                                |             | 0.147 (0.004) <sup>*</sup> | 0.002 (0.003) <sup>†</sup> |
| <p>The basic model includes variables forced into all models.</p> <p>The reduced model includes variables selected through forward stepwise procedure (Wald <math>P &lt; 0.20</math>) and excludes those eliminated through consideration of model fit, discrimination and calibration. The reduced model forms the basis for final validation models (after consideration of position of HF codes).</p> <p>The extended model includes all variables selected through forward stepwise procedure (Wald <math>P &lt; 0.20</math>).</p> <p><sup>*</sup> Compared to basic model.</p> <p><sup>†</sup> Compared to reduced model.</p> |             |                            |                            |

**Web Table 7.** Weighted proportion of sampling codes among ARIC ADHF Surveillance and the NIS

| ICD Code | Description                           | ARIC (2005–2010)<br>Weighted <i>n</i> = 52,065 |              | NIS (1998–2011)<br>Weighted <i>n</i> = 57 Million |              |
|----------|---------------------------------------|------------------------------------------------|--------------|---------------------------------------------------|--------------|
|          |                                       | Primary Position                               | Any Position | Primary Position                                  | Any Position |
| 428      | HF                                    | 19.47                                          | 89.46        | 22.00                                             | 87.88        |
| 398      | Rheumatic HF                          | 0                                              | 4.62         | 0.02                                              | 1.62         |
| 402      | Hypertensive HF                       | 0.21                                           | 4.71         | 0.13                                              | 3.38         |
| 404      | Renal HF                              | 0.16                                           | 2.6          | 0.10                                              | 1.97         |
| 415/416  | Acute/chronic pulmonary heart disease | 0.16                                           | 5.41         | 0.28                                              | 1.85         |
| 425      | Cardiomyopathy                        | 2.96                                           | 10.45        | 3.72                                              | 14.78        |
| 518      | Acute lung edema                      | 0.01                                           | 0.74         | 0.01                                              | 0.40         |
| 786      | Dyspnea and respiratory abnormalities | 0.51                                           | 2.88         | 0.26                                              | 3.83         |
| Total*   |                                       | 23.49                                          | 120.87       | 26.52                                             | 115.70       |

\*Some hospitalizations had more than one eligible code.

ADHF, acute decompensated heart failure; ARIC, Atherosclerosis Risk In Communities; NIS, National Inpatient Database.

**Web Table 8.** Characteristics of heart failure eligible\* hospitalizations in ARIC ADHF surveillance and National Inpatient Sample

|                                       | <b>ARIC (2005–2010)</b> | <b>NIS (1998–2011)</b> |
|---------------------------------------|-------------------------|------------------------|
| <i>n</i> (weighted)                   | 12,450 (52065)          | 11.6M (57.0M)          |
| Age group, y                          |                         |                        |
| 55-64                                 | 0.20                    | 0.16                   |
| 65-74                                 | 0.25                    | 0.25                   |
| ≥ 75                                  | 0.55                    | 0.60                   |
| Male                                  | 0.45                    | 0.45                   |
| Caucasians†                           | 0.72                    | 0.60**                 |
| Heart valve disorder                  | 0.13                    | 0.14                   |
| Rheumatic HF                          | 0.01                    | 0.02                   |
| Hypertension                          | 0.45                    | 0.40                   |
| Hypertensive HF                       | 0.03                    | 0.03                   |
| Diabetes                              | 0.45                    | 0.36                   |
| Coronary atherosclerosis              | 0.50                    | 0.48                   |
| Acute myocardial infarction           | 0.07                    | 0.08                   |
| Cardiomyopathy                        | 0.15                    | 0.15                   |
| Atrial fibrillation                   | 0.27                    | 0.34                   |
| Other arrhythmias (non-AF)            | 0.16                    | 0.13                   |
| Conduction disorders                  | 0.10                    | 0.14                   |
| Chronic kidney disease                | 0.29                    | 0.15                   |
| Acute kidney injury                   | 0.19                    | 0.12                   |
| Fluid and electrolyte disorder        | 0.10                    | 0.06                   |
| Renal HF                              | 0.03                    | 0.02                   |
| Dyspnea and respiratory abnormalities | 0.07                    | 0.04                   |
| COPD exacerbation                     | 0.11                    | 0.10                   |
| Pneumonia                             | 0.18                    | 0.16                   |
| Pulmonary heart disease               | 0.02                    | 0.02                   |
| Anemia                                | 0.25                    | 0.16                   |
| Teaching hospital                     | 0.37                    | 0.40                   |

Abbreviations: ADHF, acute decompensated heart failure; AF, atrial fibrillation; ARIC, Atherosclerosis Risk in Communities; COPD, chronic obstructive pulmonary disease; HF, heart failure.

\* Eligible sample of hospitalizations among age ≥55 years are defined by hospital ICD codes as detailed in methods and Web Table 1.

† Estimated among those with nonmissing values as race is missing for 23% hospitalizations in the NIS.

**Web Table 9.** Multivariable model to predict ADHF among hospitalizations with ICD code 428 in primary position

|                                       | <b>Beta Coefficient</b> | <b>Odds Ratio</b>                            | <b>95% CI</b> |       | <b>P Value</b> |
|---------------------------------------|-------------------------|----------------------------------------------|---------------|-------|----------------|
| Intercept                             | 1.683                   |                                              |               |       | <.0001         |
| Age 65-74 years vs. 55-64 years       | -0.222                  | 0.80                                         | 0.49          | 1.32  | 0.38           |
| Age 75 years or older vs. 55-64 years | -0.225                  | 0.80                                         | 0.50          | 1.27  | 0.35           |
| Females vs. male                      | 0.145                   | 1.16                                         | 0.82          | 1.64  | 0.41           |
| Caucasians vs. others                 | -0.009                  | 0.99                                         | 0.68          | 1.49  | 0.96           |
| Teaching vs. nonteaching hospital     | 0.351                   | 1.42                                         | 0.95          | 2.12  | 0.09           |
| Heart valve disorder                  | 1.166                   | 3.21                                         | 1.86          | 5.52  | <.0001         |
| Chronic kidney disease                | 0.609                   | 1.84                                         | 1.24          | 2.74  | <0.01          |
| Acute myocardial infarction           | 2.258                   | 9.57                                         | 2.24          | 40.84 | <0.01          |
| Atrial fibrillation                   | 0.574                   | 1.78                                         | 1.20          | 2.64  | <0.01          |
| Optimism-corrected AUC = 0.631        |                         | Optimism-corrected calibration slope = 0.864 |               |       |                |

**Web Table 10.** Multivariable model to predict ADHF among hospitalizations with ICD code 428 in nonprimary position

|                                                  | <b>Beta Coefficient</b> | <b>Odds Ratio</b>                           | <b>95% CI</b> |       | <b>P Value</b> |
|--------------------------------------------------|-------------------------|---------------------------------------------|---------------|-------|----------------|
| Intercept                                        | -1.934                  |                                             |               |       | <.0001         |
| Age 65-74 years vs. 55-64 years                  | -0.131                  | 0.88                                        | 0.73          | 1.06  | 0.17           |
| Age 75 years or older vs. 55-64 years            | -0.093                  | 0.91                                        | 0.77          | 1.08  | 0.29           |
| Female vs. male                                  | 0.062                   | 1.06                                        | 0.94          | 1.21  | 0.34           |
| Caucasians vs. others                            | 0.001                   | 0.99                                        | 0.88          | 1.15  | 0.99           |
| Teaching vs. nonteaching hospital                | 0.215                   | 1.24                                        | 1.08          | 1.42  | <0.01          |
| Acute myocardial infarction                      | 1.424                   | 4.16                                        | 3.24          | 5.32  | <.0001         |
| Other heart failure in primary position          | 2.961                   | 19.31                                       | 12.22         | 30.52 | <.0001         |
| Other heart failure in nonprimary position       | 0.642                   | 1.90                                        | 1.48          | 2.43  | <.0001         |
| Pneumonia                                        | 0.743                   | 2.10                                        | 1.79          | 2.47  | <.0001         |
| Heart failure code 428 in 2nd position           | 0.771                   | 2.16                                        | 1.87          | 2.49  | <.0001         |
| Acute kidney injury                              | 0.522                   | 1.69                                        | 1.45          | 1.96  | <.0001         |
| Atrial fibrillation                              | 0.416                   | 1.52                                        | 1.33          | 1.74  | <.0001         |
| Chronic obstructive pulmonary disease            | 0.644                   | 1.90                                        | 1.58          | 2.29  | <.0001         |
| Heart valve disorder                             | 0.477                   | 1.61                                        | 1.33          | 1.95  | <.0001         |
| Cardiomyopathy                                   | 0.501                   | 1.65                                        | 1.35          | 2.02  | <.0001         |
| Other fluid and electrolyte disorders            | 0.417                   | 1.52                                        | 1.25          | 1.85  | <.0001         |
| Dyspnea and respiratory abnormalities primary    | 1.478                   | 4.38                                        | 2.21          | 8.69  | <.0001         |
| Dyspnea and respiratory abnormalities nonprimary | 0.591                   | 1.81                                        | 1.18          | 2.76  | <0.01          |
| Uncomplicated hypertension                       | -0.253                  | 0.78                                        | 0.68          | 0.89  | <0.001         |
| Conduction disorder                              | 0.310                   | 1.36                                        | 1.17          | 1.67  | <0.01          |
| Cardiac dysrhythmia (not AF or atrial flutter)   | 0.252                   | 1.29                                        | 1.09          | 1.53  | <0.01          |
| Optimism-corrected AUC = 0.734                   |                         | Optimism-corrected calibration slope = 1.00 |               |       |                |

**Web Table 11.** Multivariable model to predict ADHF among those hospitalizations with ICD code 428 absent with other eligible codes

|                                            | <b>Beta<br/>Coefficient</b> | <b>Odds Ratio</b>                           | <b>95% CI</b> |        | <b>P<br/>Value</b> |
|--------------------------------------------|-----------------------------|---------------------------------------------|---------------|--------|--------------------|
| Intercept                                  | -2.904                      |                                             |               |        | <.0001             |
| Age 65-74 years vs. 55-64 years            | -0.396                      | 0.67                                        | 0.47          | 0.97   | 0.03               |
| Age 75 years or older vs. 55-64 years      | -0.262                      | 0.77                                        | 0.54          | 1.09   | 0.14               |
| Females vs. male                           | -0.021                      | 0.98                                        | 0.75          | 1.28   | 0.88               |
| Caucasians vs. others                      | -0.004                      | 1.03                                        | 0.79          | 1.35   | 0.98               |
| Teaching vs. nonteaching hospital          | 0.291                       | 1.34                                        | 1.01          | 1.77   | 0.04               |
| Other heart failure in primary position    | 4.469                       | 87.29                                       | 43.96         | 173.30 | <.0001             |
| Other heart failure in nonprimary position | 1.888                       | 6.61                                        | 4.70          | 9.30   | <.0001             |
| Acute myocardial infarction                | 1.322                       | 3.75                                        | 2.37          | 5.92   | <.0001             |
| Chronic kidney disease                     | 0.701                       | 2.02                                        | 1.48          | 2.75   | <0.001             |
| Other fluid and electrolyte disorders      | 0.849                       | 2.34                                        | 1.62          | 3.37   | <.01               |
| Atrial fibrillation                        | 0.455                       | 1.58                                        | 1.19          | 2.08   | <0.01              |
| Cardiomyopathy in primary position         | 1.581                       | 4.86                                        | 2.49          | 9.48   | <0.001             |
| Cardiomyopathy in nonprimary position      | 0.361                       | 1.44                                        | 1.03          | 2.00   | 0.03               |
| Optimism-corrected AUC = 0.807             |                             | Optimism-corrected calibration slope = 1.03 |               |        |                    |



**Web Figure 1.** Area under the receiver operating characteristic (ROC) curve (AUC) for risk score to predict hospitalized ADHF with predictors that include age, sex, teaching hospital status, and comorbidity defined with discharge codes for 428 primary (A), nonprimary (B), and absent (C).

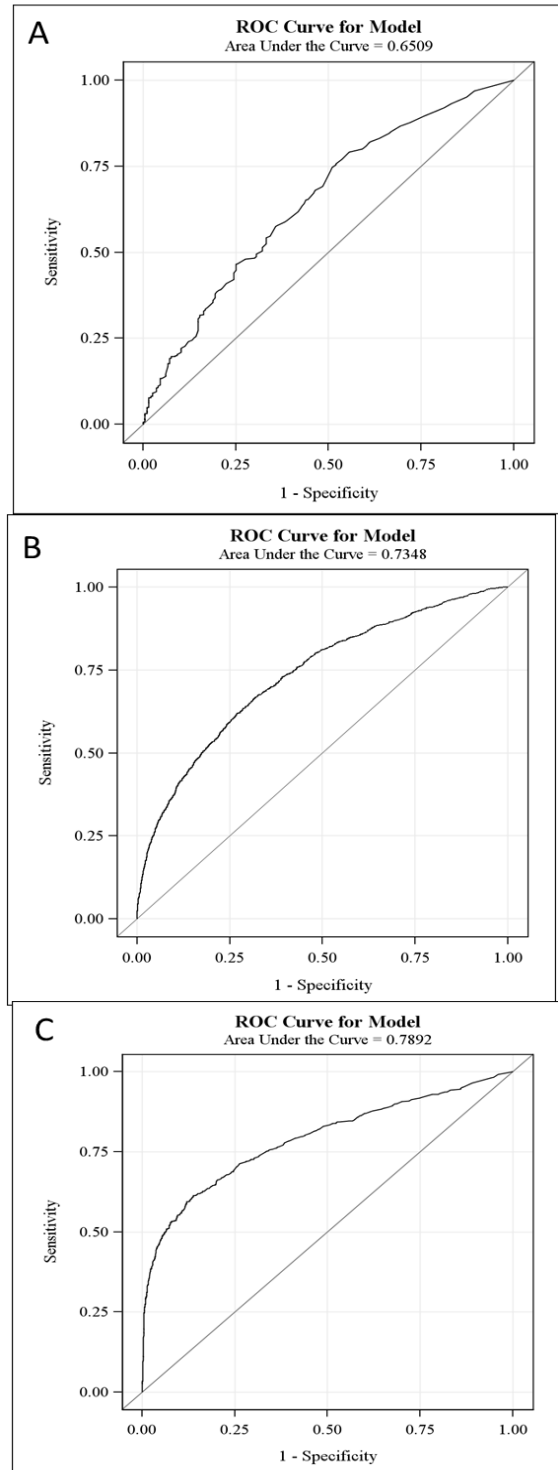

| <b>Web Table 12.</b> Frequency of hospitalization by ICD-9-CM code 428 group                                                                                        |                                     |           |                                        |           |                        |           |
|---------------------------------------------------------------------------------------------------------------------------------------------------------------------|-------------------------------------|-----------|----------------------------------------|-----------|------------------------|-----------|
| <b>Year</b>                                                                                                                                                         | <b>Code 428 in Primary Position</b> |           | <b>Code 428 in Nonprimary Position</b> |           | <b>Code 428 Absent</b> |           |
|                                                                                                                                                                     | <b>Frequency</b>                    | <b>SD</b> | <b>Frequency</b>                       | <b>SD</b> | <b>Frequency</b>       | <b>SD</b> |
| 1998                                                                                                                                                                | 890962                              | 34535     | 2189319                                | 88402     | 567203                 | 24827     |
| 1999                                                                                                                                                                | 868367                              | 34115     | 2190989                                | 89011     | 553378                 | 24457     |
| 2000                                                                                                                                                                | 895087                              | 35014     | 2296143                                | 94560     | 565858                 | 24324     |
| 2001                                                                                                                                                                | 916546                              | 35887     | 2379843                                | 96417     | 596250                 | 25758     |
| 2002                                                                                                                                                                | 913181                              | 36710     | 2502076                                | 103384    | 557740                 | 24176     |
| 2003                                                                                                                                                                | 964841                              | 39065     | 2734050                                | 112220    | 426636                 | 17873     |
| 2004                                                                                                                                                                | 944326                              | 37776     | 2832909                                | 115963    | 394506                 | 17061     |
| 2005                                                                                                                                                                | 929129                              | 37709     | 2928677                                | 120616    | 421119                 | 19224     |
| 2006                                                                                                                                                                | 923017                              | 37926     | 2974077                                | 122685    | 458451                 | 21310     |
| 2007                                                                                                                                                                | 860950                              | 34604     | 2868838                                | 116465    | 466020                 | 20548     |
| 2008                                                                                                                                                                | 869330                              | 35320     | 2842275                                | 117832    | 533613                 | 24845     |
| 2009                                                                                                                                                                | 880859                              | 36794     | 2860827                                | 120034    | 488718                 | 22745     |
| 2010                                                                                                                                                                | 841580                              | 34792     | 2874857                                | 120209    | 430999                 | 18955     |
| 2011                                                                                                                                                                | 850855                              | 34708     | 3097806                                | 131097    | 455369                 | 20509     |
| ADHF, acute decompensated heart failure; ICD-9-CM, <i>International Classification of Diseases, Ninth Revision, Clinical Modification</i> ; SD, standard deviation. |                                     |           |                                        |           |                        |           |
| Data from the National Inpatient Sample.                                                                                                                            |                                     |           |                                        |           |                        |           |

| <b>Web Table 13.</b> Annual percentage change in the estimates for hospitalizations, hospitalization rates, estimated ADHF, and estimated ADHF rate by ICD-9-CM code 428 group                                                                                                                                                                                                                       |            |                                 |                     |
|------------------------------------------------------------------------------------------------------------------------------------------------------------------------------------------------------------------------------------------------------------------------------------------------------------------------------------------------------------------------------------------------------|------------|---------------------------------|---------------------|
|                                                                                                                                                                                                                                                                                                                                                                                                      |            | <b>1998–2004</b>                | <b>2005–2011</b>    |
|                                                                                                                                                                                                                                                                                                                                                                                                      |            | <b>Annual % change (95% CI)</b> |                     |
| <b>Hospitalizations</b>                                                                                                                                                                                                                                                                                                                                                                              |            |                                 |                     |
|                                                                                                                                                                                                                                                                                                                                                                                                      | Primary    | 1.4 (0.8, 2.1)                  | -1.5 (-2.2, -0.8)   |
|                                                                                                                                                                                                                                                                                                                                                                                                      | Nonprimary | 4.6 (3.7, 5.4)                  | 0.3 (-0.8, 1.2)     |
|                                                                                                                                                                                                                                                                                                                                                                                                      | Absent     | -6.5 (-10.1, -4.5)              | 0.6 (-2.4, 2.3)     |
| <b>Hospitalization rate</b>                                                                                                                                                                                                                                                                                                                                                                          |            |                                 |                     |
|                                                                                                                                                                                                                                                                                                                                                                                                      | Primary    | -0.7 (-1.3, -0.1)               | -4.2 (-4.8, -3.5)   |
|                                                                                                                                                                                                                                                                                                                                                                                                      | Nonprimary | 2.4 (1.8, 3.1)                  | -2.5 (-3.4, -1.5)   |
|                                                                                                                                                                                                                                                                                                                                                                                                      | Absent     | -8.5 (-11.6, -5.4)              | -2.2 (-4.5, 0.2)    |
| <b>Estimated ADHF</b>                                                                                                                                                                                                                                                                                                                                                                                |            |                                 |                     |
|                                                                                                                                                                                                                                                                                                                                                                                                      | Primary    | 1.5 (0.9, 2.9)                  | -1.2 (-1.8, -0.5)   |
|                                                                                                                                                                                                                                                                                                                                                                                                      | Nonprimary | 5.8 (4.6, 7.1)                  | 0.6 (-1.0, 2.1)     |
|                                                                                                                                                                                                                                                                                                                                                                                                      | Absent     | -17.2 (-21.9, -12.1)            | -8.9 (-13.2, -4.4)  |
|                                                                                                                                                                                                                                                                                                                                                                                                      | Total      | 2.0 (1.6, 2.5)                  | -0.5 (-1.4, 0.3)    |
| <b>Estimated ADHF rate</b>                                                                                                                                                                                                                                                                                                                                                                           |            |                                 |                     |
|                                                                                                                                                                                                                                                                                                                                                                                                      | Primary    | -0.7(-1.2, -0.1)                | -3.9(-4.5, -3.3)    |
|                                                                                                                                                                                                                                                                                                                                                                                                      | Nonprimary | 3.6 (2.6, 4.7)                  | -2.2(-3.7, -0.7)    |
|                                                                                                                                                                                                                                                                                                                                                                                                      | Absent     | -19.0 (-23.8, -14 .0)           | -11.4 (-15.6, -7.0) |
|                                                                                                                                                                                                                                                                                                                                                                                                      | Total      | -0.1(-0.6, 0.3)                 | -3.2 (-4.1, -2.4)   |
| <p>Estimates were based on National Inpatient Sample of hospitalizations with ICD code 428.xx in the primary position, vs. nonprimary position, vs. other absent with other eligible ICD code. ADHF frequency and rates are based on estimations using validated models in the ARIC study. US Census data were used for estimation of rates. Figure 3 shows the trends. CI, confidence interval.</p> |            |                                 |                     |

**Web Table 14.** Estimated ADHF hospitalizations by ICD-9-CM codes 428 groups and overall

| Year | Code 428 in Primary Position |       | Code 428 in Nonprimary Position |       | Code 428 Absent |       | Total     |       |
|------|------------------------------|-------|---------------------------------|-------|-----------------|-------|-----------|-------|
|      | Frequency                    | SD    | Frequency                       | SD    | Frequency       | SD    | Frequency | SD    |
| 1998 | 791297                       | 31056 | 632198                          | 26633 | 212324          | 10372 | 1635819   | 64967 |
| 1999 | 771369                       | 30695 | 641004                          | 27459 | 195154          | 9557  | 1607527   | 64867 |
| 2000 | 793680                       | 31465 | 666960                          | 28893 | 194341          | 9356  | 1654981   | 66997 |
| 2001 | 813457                       | 32255 | 693758                          | 29665 | 198836          | 9535  | 1706050   | 68857 |
| 2002 | 811669                       | 33027 | 745516                          | 32418 | 174935          | 8370  | 1732119   | 71702 |
| 2003 | 859092                       | 35189 | 850516                          | 36323 | 94614           | 4584  | 1804223   | 74271 |
| 2004 | 841276                       | 34034 | 879857                          | 37458 | 82981           | 4190  | 1804115   | 73973 |
| 2005 | 830608                       | 34163 | 915668                          | 39892 | 89447           | 5023  | 1835723   | 77273 |
| 2006 | 832442                       | 34623 | 942714                          | 40849 | 101516          | 5705  | 1876672   | 79151 |
| 2007 | 781585                       | 31755 | 909107                          | 39013 | 102259          | 5152  | 1792950   | 74071 |
| 2008 | 788655                       | 32367 | 865644                          | 37916 | 107813          | 5838  | 1762112   | 74079 |
| 2009 | 801146                       | 33806 | 894866                          | 39611 | 80416           | 4184  | 1776427   | 76107 |
| 2010 | 767130                       | 32011 | 911541                          | 40057 | 59579           | 2894  | 1738251   | 73646 |
| 2011 | 777056                       | 32009 | 1005922                         | 44911 | 63915           | 3235  | 1846892   | 78651 |

ADHF, acute decompensated heart failure; ARIC, Atherosclerosis Risk in Communities; ICD-9-CM, *International Classification of Diseases, Ninth Revision, Clinical Modification*; SD, standard deviation.

Estimates were obtained by application of models derived in an ARIC ADHF validation study to the National Inpatient Sample.

### WEB FIGURES 2 AND 3

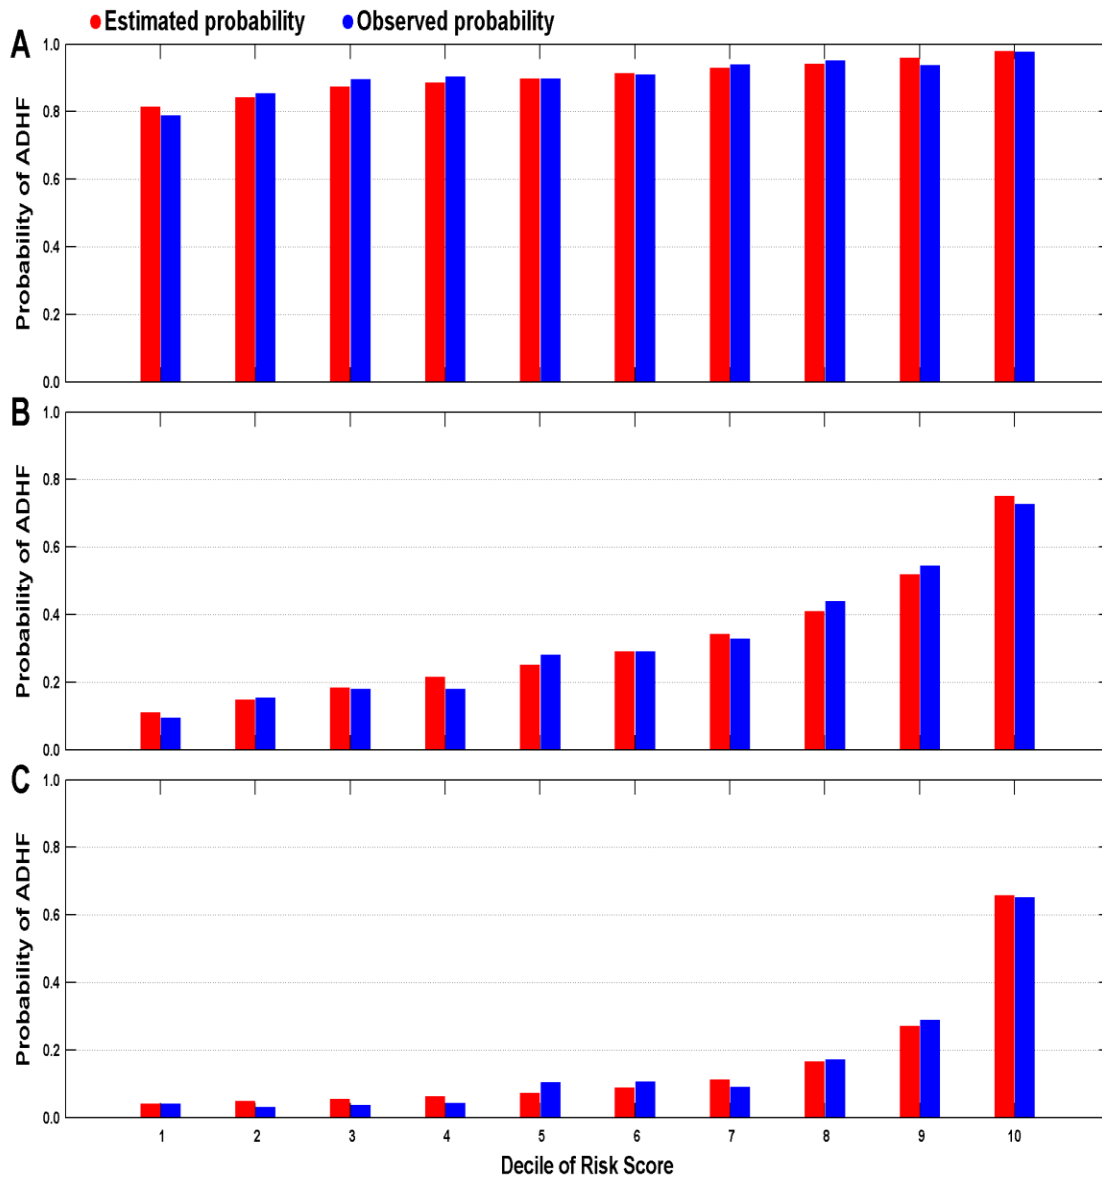

**Web Figure 2.** Predicted versus observed probability of acute decompensated heart failure (ADHF) hospitalization by decile of risk scores derived for 428 primary (A), nonprimary (B), and absent (C), separately.

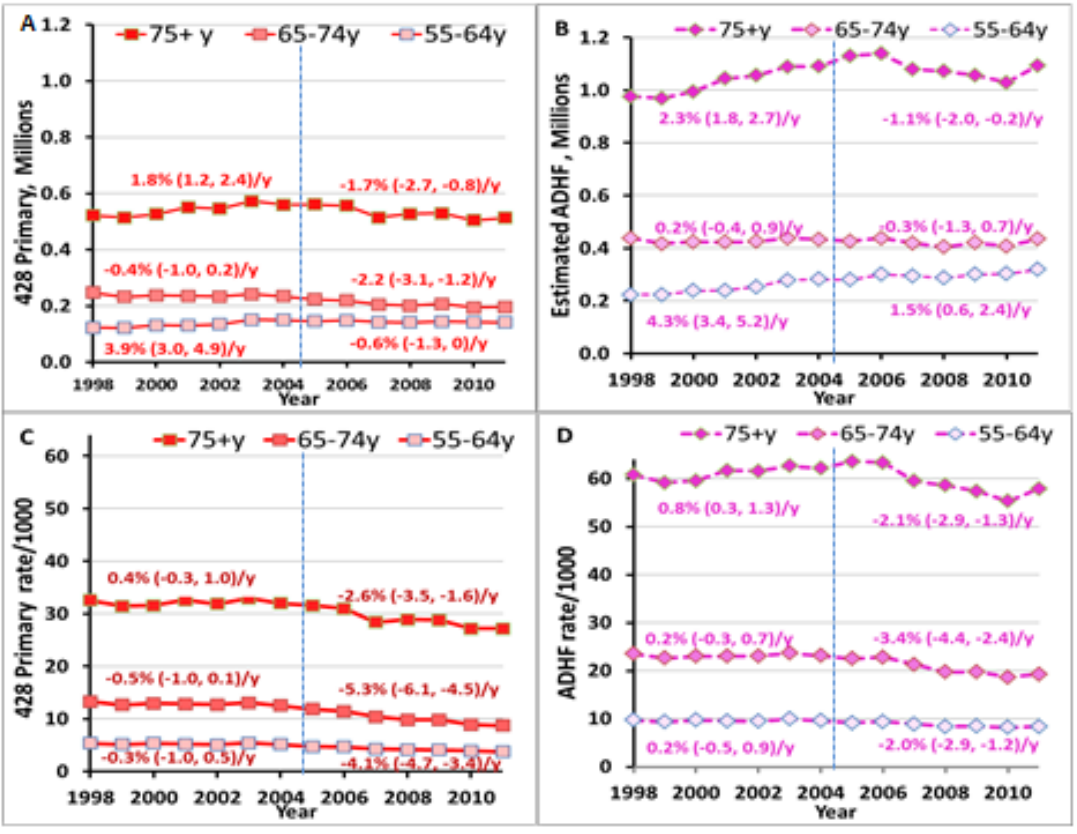

**Web Figure 3.** Comparison of hospitalizations with ICD-9-CM code 428 primary with acute decompensated heart failure (ADHF) in the United States during 1998–2011, by age group. Panels show discharge code 428 in primary position (A), estimated ADHF hospitalizations (B), and corresponding rates per 1000 persons for 428 primary (C), and estimated ADHF (D). Trends for 1998–2004 and 2005–2011 are shown as annual percent change.
